# Supplementary material for: Arsenic source-sink dynamics under phosphorus competition in sediments from river–lake connected systems
Source: Royal Society of Chemistry journal article supplement (doi:10.1039/d4em00707g), 2025-01-01

## Supplementary Materials

### **Arsenic Source-Sink Dynamics under Phosphorus Competition in Sediments from River-Lake Connected Systems**

#### **SI Data analysis**

The arsenic (As) and phosphorus (P) adsorption capacity of the sediment samples at each time period,  $Q_t$  ( $\text{mg}\cdot\text{g}^{-1}$ ), was calculated by the following equation:

$$Q_t = \frac{(C_0 - C_t)V}{W}$$

where  $C_0$  ( $\text{mg}\cdot\text{L}^{-1}$ ) was initial mass concentration of As or P,  $C_t$  ( $\text{mg}\cdot\text{L}^{-1}$ ) was the blank corrected mass concentration of As or P at time  $t$ ,  $V$  (L) was the volume of the solution, and  $W$  (g) was the quality of dried sediment sample.

Modified Freundlich and Freundlich crossover models were used to draw the adsorption isotherm of As or P (Liu et al., 2021; Mozaffari Majd et al., 2021). The equations of As and P were the same, and taking As for the examples, the equations of the models are as follows:

$$Q_e = K_F C_e^n - K_F (C_e^0)^n - Q_e^0$$

$$\text{NAAs} = K_F (C_e^0)^n + Q_e^0$$

$$\text{EAs}C_0 = \sqrt[n]{\frac{\text{NAAs}}{K_F}}$$

Where  $K_F$  is the adsorption coefficient calculated by modified Freundlich ( $\text{L}\cdot\text{g}^{-1}$ );  $C_e$  is the As or P concentration in the aqueous phase at equilibrium ( $\text{mg}\cdot\text{L}^{-1}$ ); NAAs is the native adsorbed As ( $\text{mg}\cdot\text{kg}^{-1}$ );  $\text{EAs}C_0$  is the zero equilibrium As concentration calculated by modified Freundlich ( $\text{mg}\cdot\text{L}^{-1}$ ).

$$Q_e = K_F (C_e^n - \text{EAs}C_0^n)$$

$$K_{d-\text{eq}} = nK_F (C_{As})^{n-1}$$

Where  $K_f$  is the adsorption coefficient calculated by Freundlich crossover model ( $L \cdot g^{-1}$ ), and  $EAsC_F$  is the zero equilibrium As concentration calculated by Freundlich crossover model ( $mg \cdot L^{-1}$ );  $K_{d-eq}$  was partition parameter;  $C_{As}$  was the As

| Sampling sites | pH   | ORP(mV) | sAs( $mg \cdot kg^{-1}$ )10cm | sAs( $mg \cdot kg^{-1}$ )20cm | sAs( $mg \cdot kg^{-1}$ )30cm |
|----------------|------|---------|-------------------------------|-------------------------------|-------------------------------|
| R1             | 6.58 | -162.2  | 6.23                          | 3.15                          | 0.87                          |
| R2             | 5.99 | -138.6  | 5.79                          | 2.31                          | 0.46                          |
| R3             | 6.23 | -92.8   | 6.58                          | 3.05                          | 1.28                          |
| R4             | 6.34 | -104.1  | 5.36                          | 2.18                          | 0.73                          |
| R5             | 6.18 | -197.9  | 4.88                          | 1.68                          | 0.42                          |
| R6             | 6.15 | -121.6  | 5.57                          | 1.96                          | 0.38                          |
| L1             | 7.13 | -135    | 9.14                          | 7.41                          | 5.49                          |
| L2             | 7.08 | -146    | 9.06                          | 7.36                          | 5.89                          |
| L3             | 7.16 | -139    | 9.14                          | 7.49                          | 5.99                          |
| L4             | 6.90 | -148    | 7.92                          | 4.02                          | 2.09                          |
| L5             | 6.91 | -152    | 6.82                          | 3.99                          | 1.60                          |
| L6             | 6.93 | -144    | 7.52                          | 4.39                          | 2.23                          |
| LC1            | 7.21 | -193    | 10.30                         | 8.93                          | 11.05                         |
| LC2            | 7.15 | -198    | 9.38                          | 8.61                          | 10.54                         |
| LC3            | 7.22 | -188    | 11.35                         | 8.42                          | 11.38                         |

concentration in overlying water ( $mg \cdot L^{-1}$ ).

Table S1. Physical and chemical properties of sediments

Figure S1.  $\alpha$  diversity index

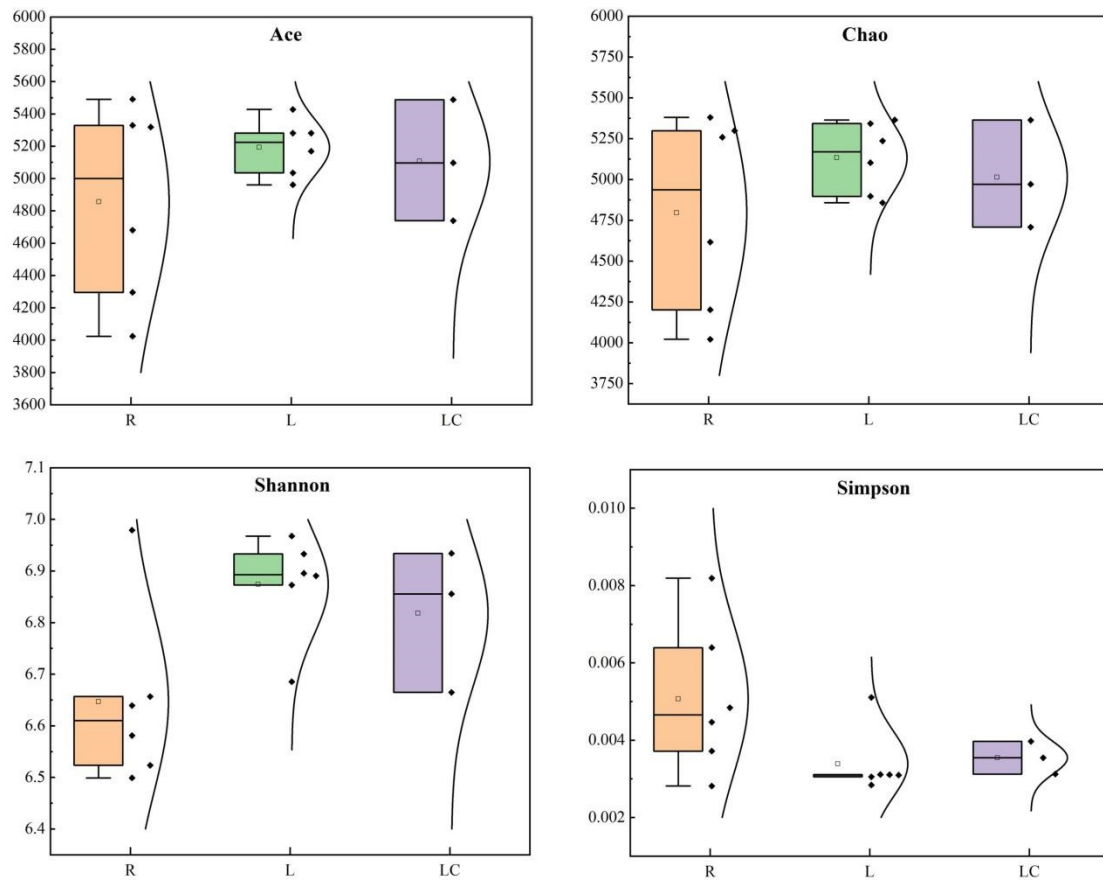

Figure S2. Two modified isothermal adsorption models, (a) for As,(b) for P

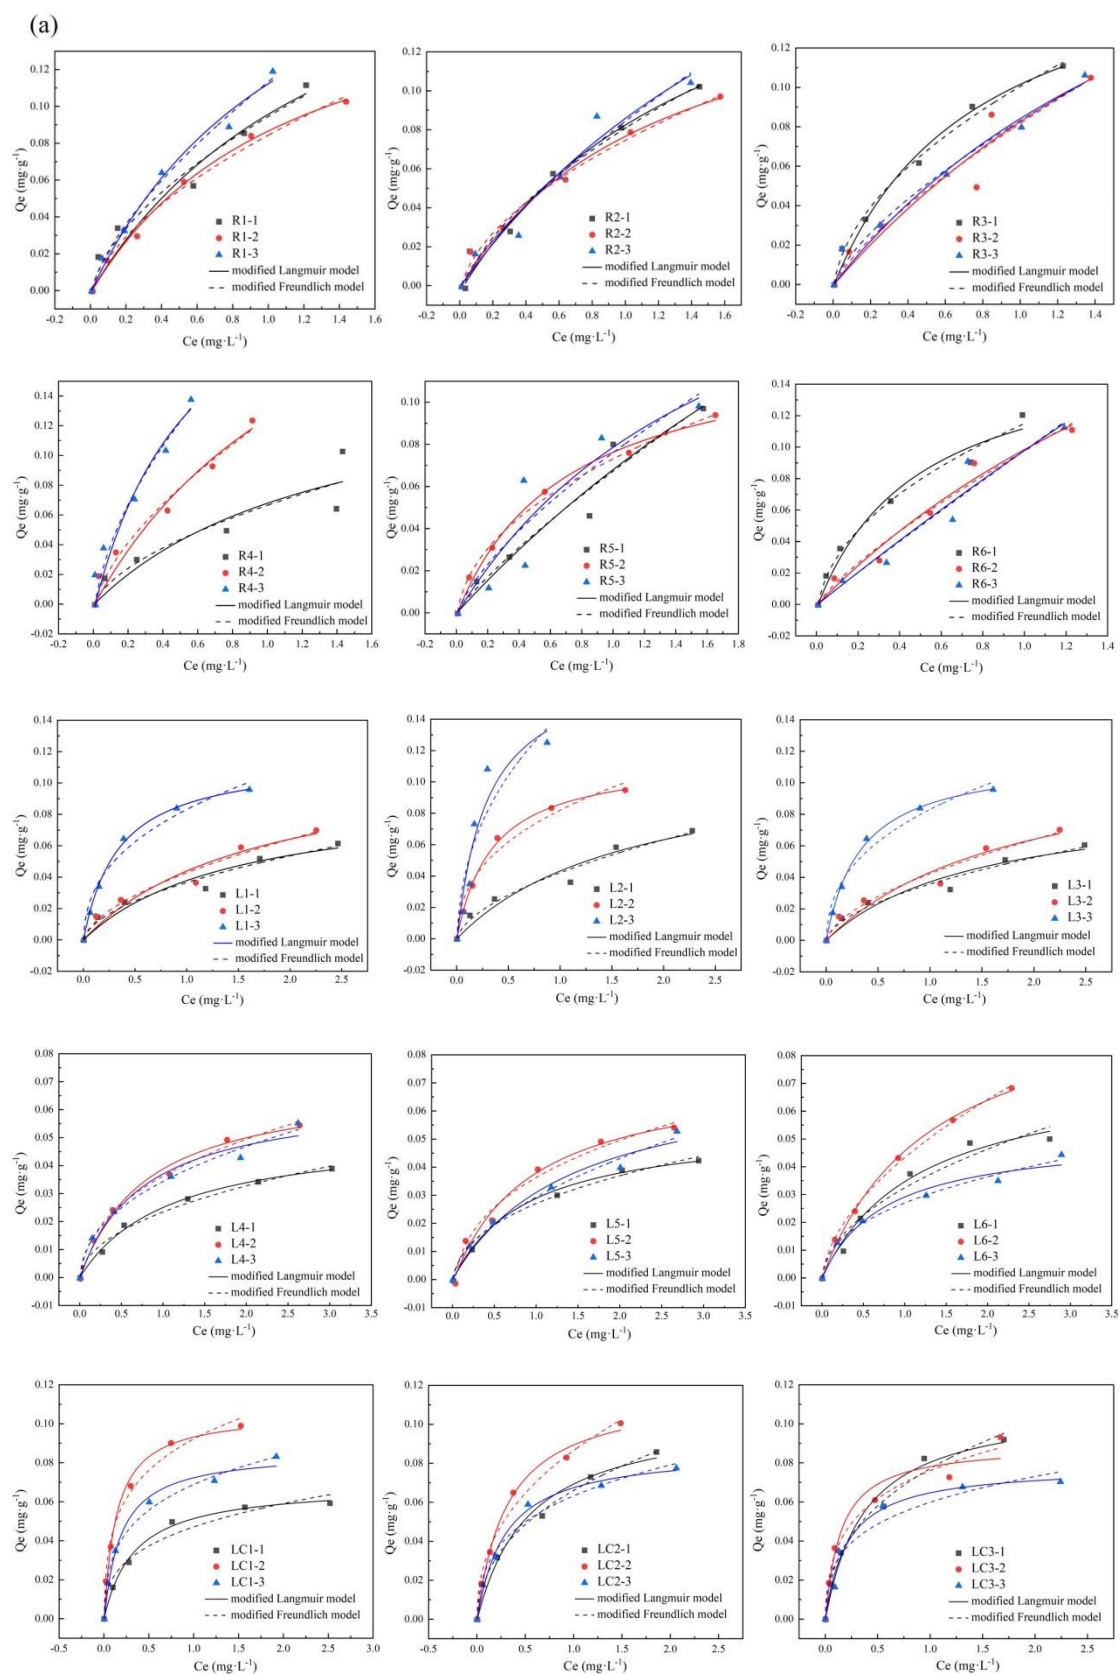

(b)

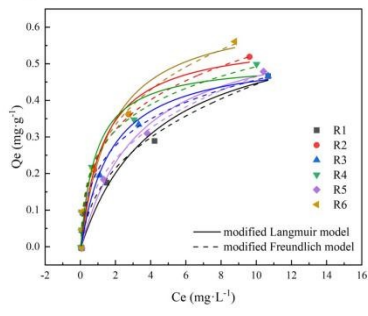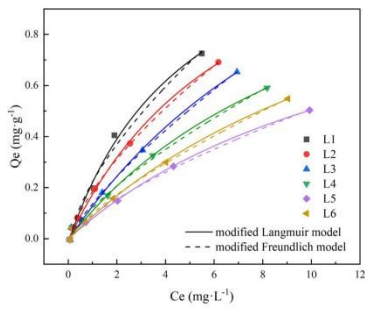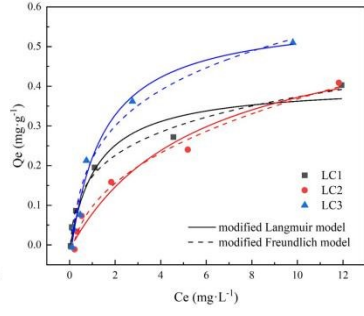

Figure S3. Modified Freundlich crossover model, (a) for As,(b) for P

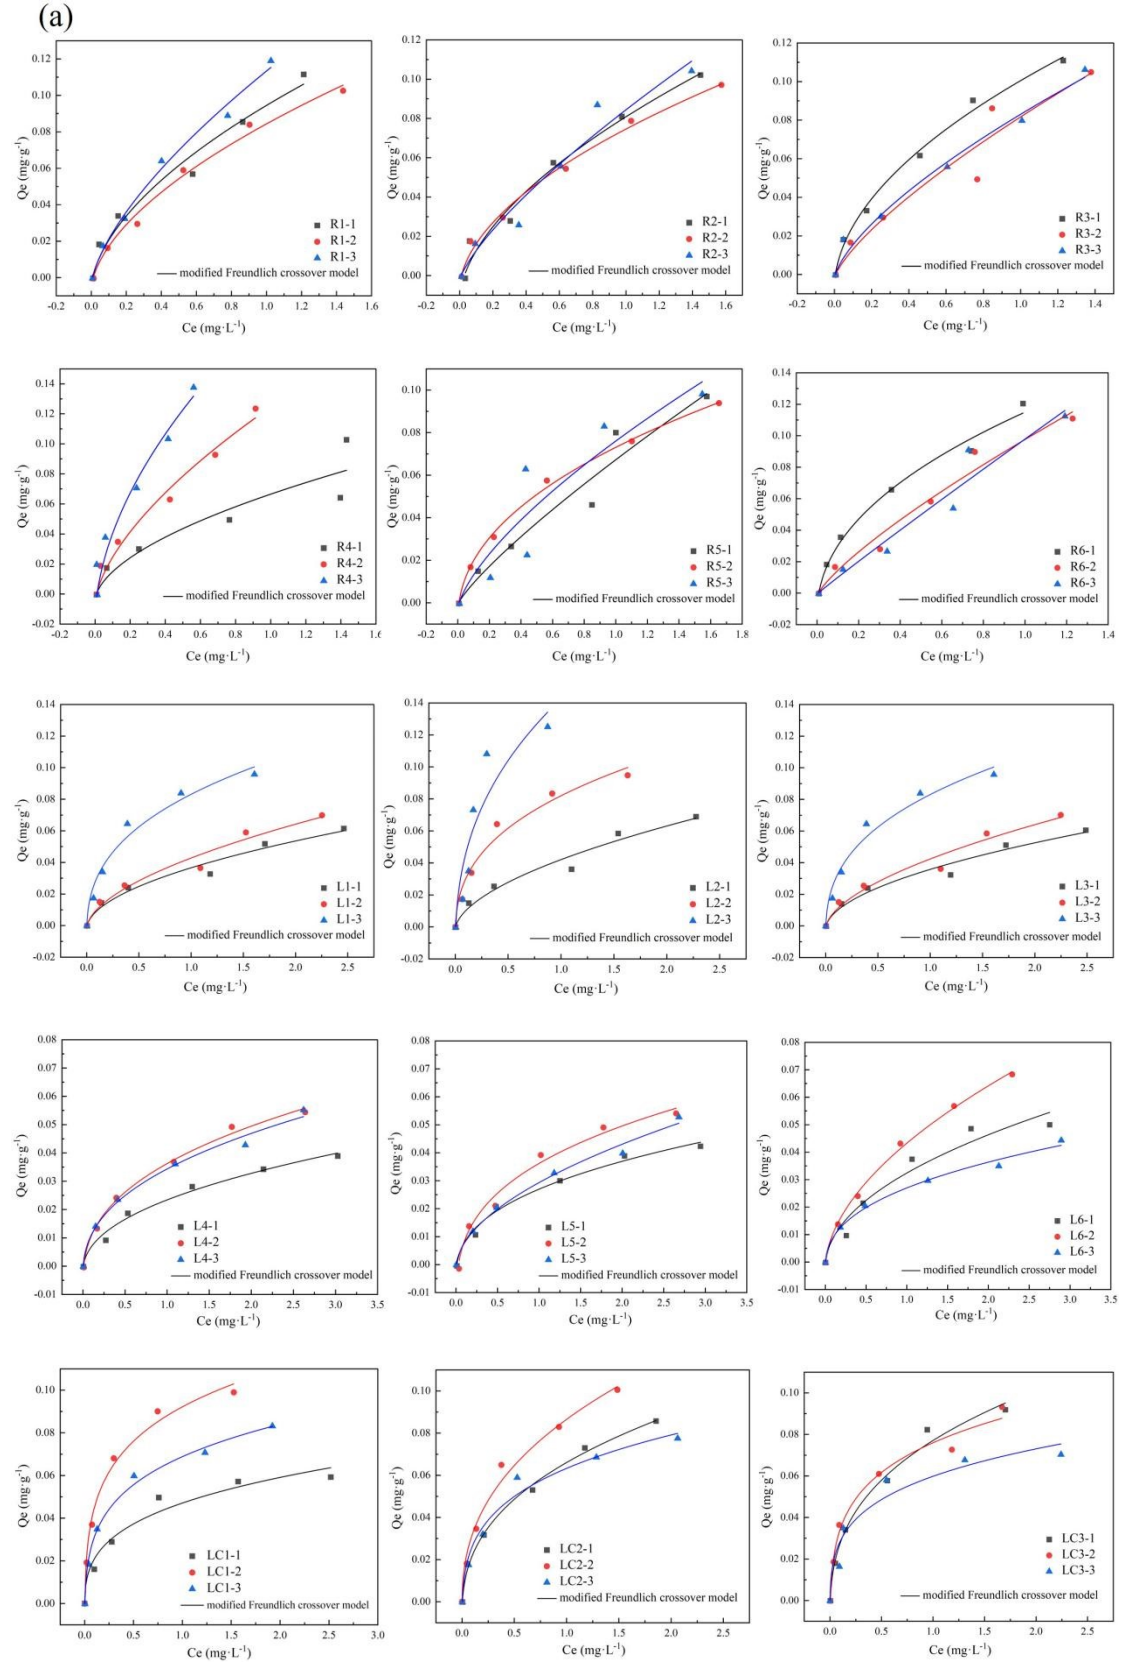

(b)

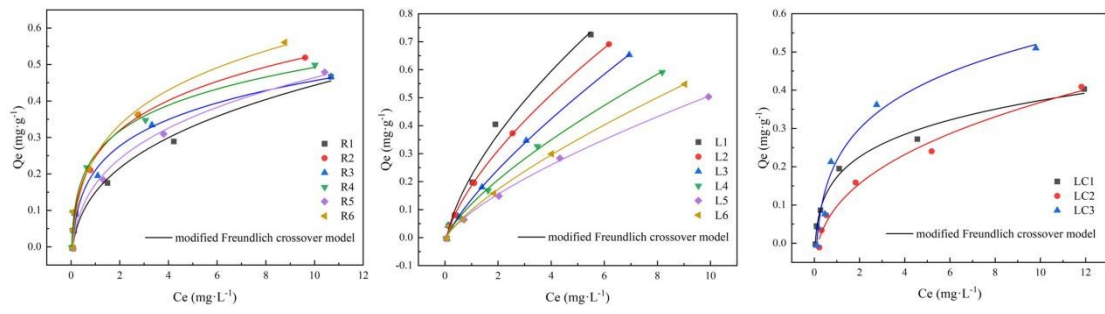

Supplement: d4em00707g1.pdf [file d4em00707g1.pdf]
